# Supplementary material for: Restricted active space spin-flip configuration interaction approach: theory, implementation and examples
Source: Royal Society of Chemistry journal article supplement (doi:10.1039/b911513g), 2009-01-01
Supplement: b911513g.pdf [file b911513g.pdf]

# Supplementary Information

June 19, 2009

## HF molecular dissociation

Table S1: SF-XCIS and RAS(6,4)-SF absolute energies (in Hartrees) along the HF molecular dissociation. All calculations were obtained using the 6-31G basis set.

| $r$ (Å) | SF-XCIS     | RAS(6,4)-SF |
|---------|-------------|-------------|
| 0.8     | -99.997399  | -99.998034  |
| 1.0     | -100.026411 | -100.027513 |
| 1.2     | -99.998433  | -99.999573  |
| 1.4     | -99.959763  | -99.960871  |
| 1.6     | -99.925181  | -99.926227  |
| 1.8     | -99.899047  | -99.900029  |
| 2.0     | -99.881652  | -99.882582  |
| 2.2     | -99.871225  | -99.872118  |
| 2.4     | -99.865433  | -99.866301  |
| 2.6     | -99.862367  | -99.863221  |
| 2.8     | -99.860785  | -99.861633  |
| 3.0     | -99.859975  | -99.860821  |
| 3.2     | -99.859559  | -99.860403  |
| 3.4     | -99.859344  | -99.860188  |

## Singlet-triplet gap in linear acenes

Figure S1: Exponential fitting ( $a + be^{-\alpha n}$ ) to the computed RAS(4,4)-SF singlet-triplet gap of the linear  $n$ -acenes. The adjusted parameters for  $2 \leq n \leq 20$  correspond to  $1.59 \pm 0.44$  kcal/mol,  $165.94 \pm 5.32$  kcal/mol and  $0.428 \pm 0.013$  for  $a$ ,  $b$  and  $\alpha$  respectively.

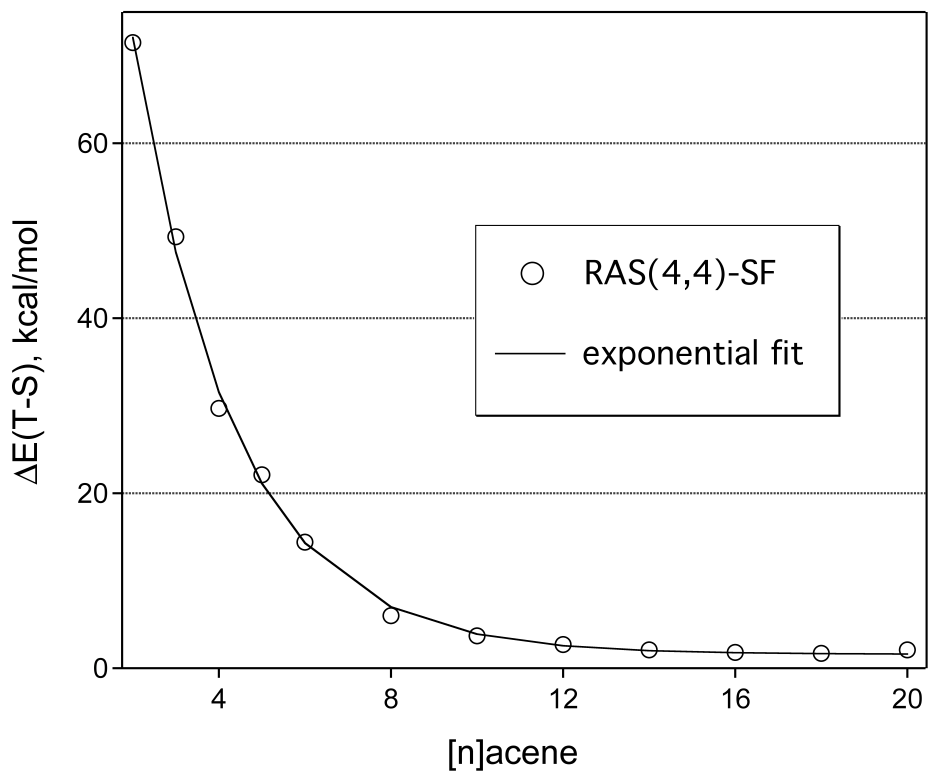

Figure S2: Graphical representation of the four singly occupied orbitals of the ROHF quintet of the 14-fused ring acene.

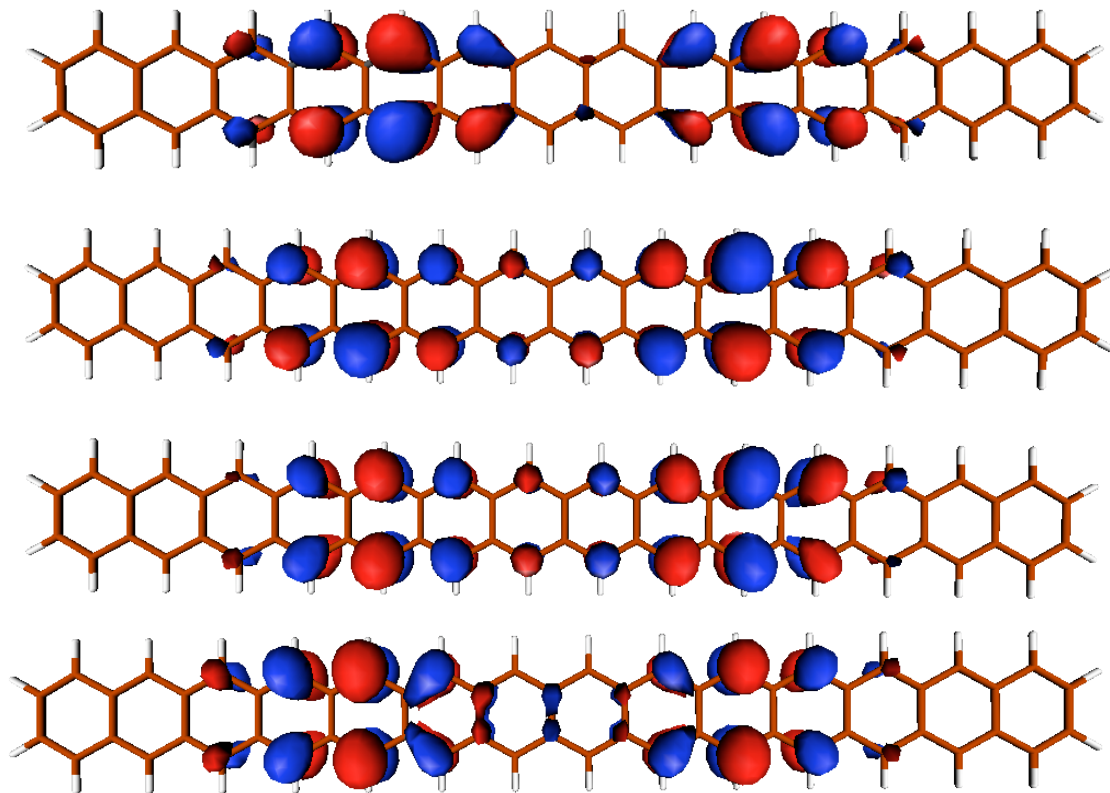

## Ni(II) Octahedral Complexes

Table S2: Experimental cartesian coordinates (in Angstroms) from Ref. 1 of  $[\text{NiF}_6]^{4-}$ .

|    |         |         |         |
|----|---------|---------|---------|
| Ni | 0.0000  | 0.0000  | 0.0000  |
| F  | 2.0070  | 0.0000  | 0.0000  |
| F  | -2.0070 | 0.0000  | 0.0000  |
| F  | 0.0000  | 2.0070  | 0.0000  |
| F  | 0.0000  | -2.0070 | 0.0000  |
| F  | 0.0000  | 0.0000  | 2.0070  |
| F  | 0.0000  | 0.0000  | -2.0070 |

Table S3: Experimental cartesian coordinates (in Angstroms) from Ref. 2 of  $[\text{Ni}(\text{H}_2\text{O})_6]^{2+}$ .

|    |         |         |          |
|----|---------|---------|----------|
| Ni | 2.24235 | 4.18561 | 0.00000  |
| O  | 0.51846 | 3.13729 | -0.27492 |
| O  | 3.31666 | 2.64823 | -0.86984 |
| O  | 1.16805 | 5.72300 | 0.86984  |
| O  | 2.00575 | 5.06886 | -1.82676 |
| O  | 2.47896 | 3.30236 | 1.82676  |
| O  | 3.96624 | 5.23394 | 0.27492  |
| H  | 0.52676 | 5.54654 | 1.28487  |
| H  | 1.56101 | 6.32102 | 1.30527  |
| H  | 4.24974 | 5.28245 | 0.92796  |
| H  | 4.35405 | 5.75971 | -0.25493 |
| H  | 2.15230 | 4.64769 | -2.45757 |
| H  | 1.28409 | 5.44812 | -2.01908 |
| H  | 3.20062 | 2.92311 | 2.01908  |
| H  | 3.95794 | 2.82468 | -1.28487 |
| H  | 2.92370 | 2.05020 | -1.30527 |
| H  | 0.13066 | 2.61151 | 0.25493  |
| H  | 0.23496 | 3.08878 | -0.92796 |
| H  | 2.33241 | 3.72353 | 2.45757  |

Table S4: Experimental cartesian coordinates (in Angstroms) from Ref. 3 of  $[\text{Ni}(\text{NH}_3)_6]^{2+}$ .

|    |           |           |          |
|----|-----------|-----------|----------|
| Ni | -15.00062 | -10.13881 | 21.00868 |
| N  | -14.96264 | -8.07406  | 21.55052 |
| N  | -14.97831 | -12.20459 | 20.46988 |
| N  | -16.44043 | -9.72196  | 19.45109 |
| N  | -16.60312 | -10.50397 | 22.41279 |
| N  | -13.45518 | -9.72602  | 19.63158 |
| N  | -13.61644 | -10.60138 | 22.53356 |
| H  | -14.60307 | -12.29800 | 19.66846 |
| H  | -14.66698 | -7.99205  | 22.38577 |
| H  | -15.78477 | -7.73642  | 21.49237 |
| H  | -15.81309 | -12.51407 | 20.44444 |
| H  | -14.42139 | -7.63212  | 20.99956 |
| H  | -14.51052 | -12.66368 | 21.07174 |
| H  | -16.42228 | -10.37585 | 18.84670 |
| H  | -16.62372 | -9.85004  | 23.01706 |
| H  | -16.23791 | -8.95028  | 19.05753 |
| H  | -16.46749 | -11.28139 | 22.82341 |
| H  | -17.25485 | -9.66926  | 19.80652 |
| H  | -17.37897 | -10.52964 | 21.97714 |
| H  | -13.26468 | -8.85761  | 19.65014 |
| H  | -13.45458 | -11.47578 | 22.53278 |
| H  | -13.71903 | -9.95238  | 18.81380 |
| H  | -13.95341 | -10.36481 | 23.32103 |
| H  | -12.72983 | -10.19444 | 19.84957 |
| H  | -12.85739 | -10.15819 | 22.39045 |

Table S5: Experimental and RAS-SF with two different active spaces, i.e. (8,5) and (18,10), energy gaps (in eV) for the  $[\text{NiF}_6]^{4-}$ ,  $[\text{Ni}(\text{H}_2\text{O})_6]^{2+}$  and  $[\text{Ni}(\text{NH}_3)_6]^{2+}$  complexes.

| symmetry        | $[\text{NiF}_6]^{4-}$ |         |                  | $[\text{Ni}(\text{H}_2\text{O})_6]^{2+}$ |         |                    | $[\text{Ni}(\text{NH}_3)_6]^{2+}$ |         |                    |
|-----------------|-----------------------|---------|------------------|------------------------------------------|---------|--------------------|-----------------------------------|---------|--------------------|
|                 | (8,5)                 | (18,10) | Exp <sup>a</sup> | (8,5)                                    | (18,10) | Exp <sup>b,c</sup> | (8,5)                             | (18,10) | Exp <sup>b,c</sup> |
| $^3T_{2g}$      | 0.79                  | 0.87    | 0.90             | 0.92                                     | 0.99    | 1.05, 1.06         | 1.08                              | 1.25    | 1.33               |
| $^3T_{1g}(^3F)$ | 2.05                  | 1.49    | 1.55             | 2.09                                     | 1.69    | 1.67, 1.77         | 1.85                              | 2.08    | 2.17               |
| $^1E_g$         | 2.30                  | 2.19    | 1.91             | 2.28                                     | 2.19    | 1.91               | 2.22                              | 2.11    |                    |
| $^1T_{2g}$      | 3.12                  | 2.97    | 2.59             | 3.20                                     | 3.09    |                    | 3.22                              | 3.31    |                    |
| $^3T_{1g}(^3P)$ | 3.74                  | 3.39    | 2.95             | 3.96                                     | 3.58    | 3.14, 3.15         | 3.70                              | 3.85    | 3.50, 3.49         |
| $^1A_{1g}$      | 4.32                  | 3.60    |                  | 3.72                                     | 3.50    |                    | 3.67                              | 3.51    |                    |

<sup>a</sup>Ref 4. <sup>b</sup>Ref. 5. <sup>c</sup>Ref 6.

## Tetraradicals from weakly interaction triplets

Table S6: Singlet-quintet adiabatic energy gaps (in kcal/mol) for the organic tetraradical studied systems computed by HF, MP2 and B3LYP.

| molecule | S-Q Energy gaps |        |       | Ground state |     |       |       |
|----------|-----------------|--------|-------|--------------|-----|-------|-------|
|          | HF              | MP2    | B3LYP | HF           | MP2 | B3LYP | Expt. |
| 1        | 34.3            | 17.1   | 16.0  | Q            | Q   | Q     | Q     |
| 2        | -9.7            | 8.3    | 12.4  | S            | Q   | Q     | S     |
| 3        | 20.1            | -4.9   | 1.1   | T            | T   | Q     | Q     |
| 4        | 33.4            | 15.8   | 13.1  | Q            | Q   | Q     | Q     |
| 5        | 68.1            | 7.4    | 13.8  | Q            | Q   | Q     | Q     |
| 6        | 33.4            | 22.6   | 10.4  | Q            | Q   | Q     | Q     |
| 7        | 1.1             | 0.4    | 0.4   | Q            | Q   | Q     | Q     |
| 8        | 37.2            | 29.2   | 20.4  | Q            | Q   | Q     | Q     |
| 9        | 41.0            | 27.3   | -21.2 | Q            | Q   | S     | S     |
| 10       | 12.9            | 10.0   | 1.8   | Q            | Q   | Q     | Q     |
| 11       | 36.5            | 25.2   | 1.9   | Q            | Q   | Q     | Q     |
| 12       | 35.5            | 24.7   | 5.4   | Q            | Q   | Q     | Q     |
| 13       | 13.2            | 12.5   | -4.0  | Q            | Q   | S     | Q     |
| 14       | 6.9             | -2.3   | 7.5   | Q            | S   | Q     | T     |
| 15       | 35.6            | 25.3   | 17.1  | Q            | Q   | Q     | Q     |
| 16       | 0.1             | -8.3   | -33.7 | T            | T   | S     | S     |
| 17       | -65.2           | -82.6  | 0.7   | T            | T   | S     | Q     |
| 18       | -52.9           | -60.9  | 15.2  | S            | S   | Q     | S     |
| 19       | 34.8            | 23.4   | 15.8  | Q            | T   | Q     | S     |
| 20       | 34.8            | 23.6   | 16.1  | Q            | Q   | Q     | S     |
| 21       | 34.9            | 23.6   | 16.0  | Q            | Q   | Q     | S     |
| 22       | 37.7            | 15.9   | 0.2   | Q            | Q   | Q     | Q     |
| 23       | -131.0          | -133.2 | -1.7  | S            | S   | T     | S~T   |
| 24       | 34.3            | 22.4   | -4.5  | Q            | Q   | S     | S     |
| 25       | 34.4            | 22.0   | 8.1   | Q            | Q   | Q     | Q     |
| 26       | 34.3            | 21.8   | 15.9  | Q            | Q   | Q     | Q     |
| 27       | 28.3            | 22.9   | 16.2  | Q            | T   | S     | S~Q   |
| 28       | -58.1           | -116.8 | 16.3  | S            | S   | S     | S~Q   |

## References

- [1] A. Okazaki and Y. Suemune, *J. Phys. Soc. Jpn.* **16**, 671 (1961).
- [2] S. Banerjee, A. R. Choudhury, T. G. Row, S. Chaudhuri, and A. Ghosh, *Polyhedron* **26**, 24 (2007).
- [3] B. Paul et al., *CrystEngComm* **6**, 293 (2004).
- [4] K. Knox, R. G. Shulman, and S. Sugano, *Phys. Rev.* **130**, 512 (1963).
- [5] C. K. Jørgensen, *Acta Chem. Scand.* **9**, 1362 (1955).
- [6] M.-C. Nolet, A. Michaud, C. Bain, D. Zargarian, and C. Reber, *Photochem. Photobiol.* **82**, 57 (2006).
